# Supplementary material for: Peripheral Neuropathy in Patients with Hepatitis C Infection—Reversibility after HCV Eradication: A Single Center Study
Source: MDPI journal article supplement (doi:10.3390/v16040522), 2024-03-28
Supplement: s1 [file s1]

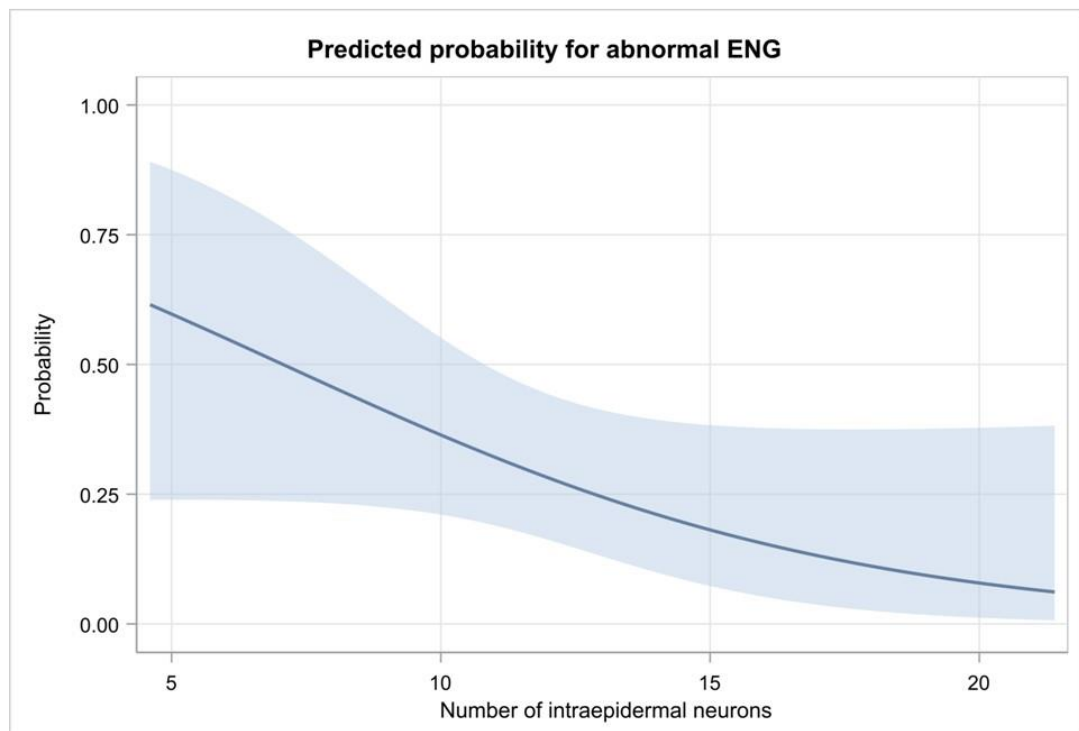

**Figure S1.** Analysis results of analysis for the probability of abnormal ENG. The shaded area indicates the 95% confidence interval for the probability for abnormal ENG prediction.
